# Supplementary material for: Recurrent hotspot SF3B1 mutations at codon 625 in vulvovaginal mucosal melanoma identified in a study of 27 Australian mucosal melanomas
Source: PubMed Central journal article supplement (PMC6398173; doi:10.18632/oncotarget.26584), 2019-01-29
Supplement: oncotarget-10-930-s001.pdf [file oncotarget-10-930-s001.pdf]

## Recurrent hotspot SF3B1 mutations at codon 625 in vulvovaginal mucosal melanoma identified in a study of 27 Australian mucosal melanomas

### SUPPLEMENTARY MATERIALS

**Supplementary Table 1: Clinical and pathological parameters of mucosal melanoma patients.** See Supplementary\_Table\_1

**Supplementary Table 2: Genetic alterations identified in mucosal melanoma**

| Patient ID | Gene   | Exon:Nucleotide change:Amino acid change | Oncogenic classification (oncodriveMUT) |
|------------|--------|------------------------------------------|-----------------------------------------|
| Patient 10 | SETD2  | exon4:c.G4487A:p.R1496Q                  | predicted driver: tier 1                |
| Patient 18 | TP53   | exon6:c.A578T:p.H193L                    | predicted driver: tier 1                |
| Patient 5  | KIT    | exon11:c.T1727C:p.L576P                  | known in: THYM;CM                       |
| Patient 11 | KIT    | exon11:c.T1727C:p.L576P                  | known in: THYM;CM                       |
| Patient 17 | KIT    | exon14:c.C2009T:p.T670I                  | known in: GIST                          |
| Patient 1  | SF3B1  | exon14:c.G1874T:p.R625L                  | predicted driver: tier 1                |
| Patient 2  | SF3B1  | exon14:c.G1874A:p.R625H                  | known in: CANCER                        |
| Patient 9  | SF3B1  | exon14:c.G1874A:p.R625H                  | known in: CANCER                        |
| Patient 10 | SF3B1  | exon23:c.G3368A:p.C1123Y                 | predicted driver: tier 1                |
| Patient 12 | SF3B1  | exon14:c.G1874A:p.R625H                  | known in: CANCER                        |
| Patient 22 | SF3B1  | exon14:c.G1874A:p.R625H                  | known in: CANCER                        |
| Patient 23 | ARID2  | exon15:c.C2458T:p.Q820X                  | predicted driver: tier 1                |
| Patient 1  | BRAF   | exon12:c.A1447G:p.K483E                  | predicted driver: tier 2                |
| Patient 23 | BRAF   | exon15:c.G1780A:p.D594N                  | known in: CM                            |
| Patient 8  | CTNNB1 | exon11:c.G1687A:p.G563R                  | predicted driver: tier 1                |
| Patient 22 | NF1    | exon28:c.T3824C:p.F1275S                 | predicted driver: tier 2                |
| Patient 21 | NRAS   | exon3:c.A182T:p.Q61L                     | known in: NSCLC; CM                     |
| Patient 25 | NRAS   | exon3:c.C181A:p.Q61K                     | known in: NSCLC;AML;THCA;COREAD;CM      |
| Patient 19 | DICER1 | exon22:c.G4702A:p.G1568S                 | predicted driver: tier 1                |
| Patient 1  | MAP2K1 | exon11:c.G1168A:p.A390T                  | known in: COREAD                        |
| Patient 26 | PTEN   | exon8:c.863dupA:p.V290Sfs*8              | predicted driver: tier 1                |

Abbreviations: AML – Acute myeloid leukaemia, COREAD – Colorectal adenocarcinoma, CM – Cutaneous melanoma, GIST – Gastrointestinal stromal tumors, NSCLC – Non-small cell lung cancer, THCA – Thyroid carcinoma, THYM – Thymoma.

**Supplementary Table 3: A custom amplicon panels designed for targeted DNA sequencing.** See Supplementary\_Table\_3
